# Supplementary material for: Activation mechanism dependent surface exposure of cellular factor XIII on activated platelets and platelet microparticles
Source: PubMed Central journal article supplement (PMC9303193; doi:10.1111/jth.15668), 2022-02-21
Supplement: JTH-20-1223-s001.pdf [file JTH-20-1223-s001.pdf]

# Supplementary material

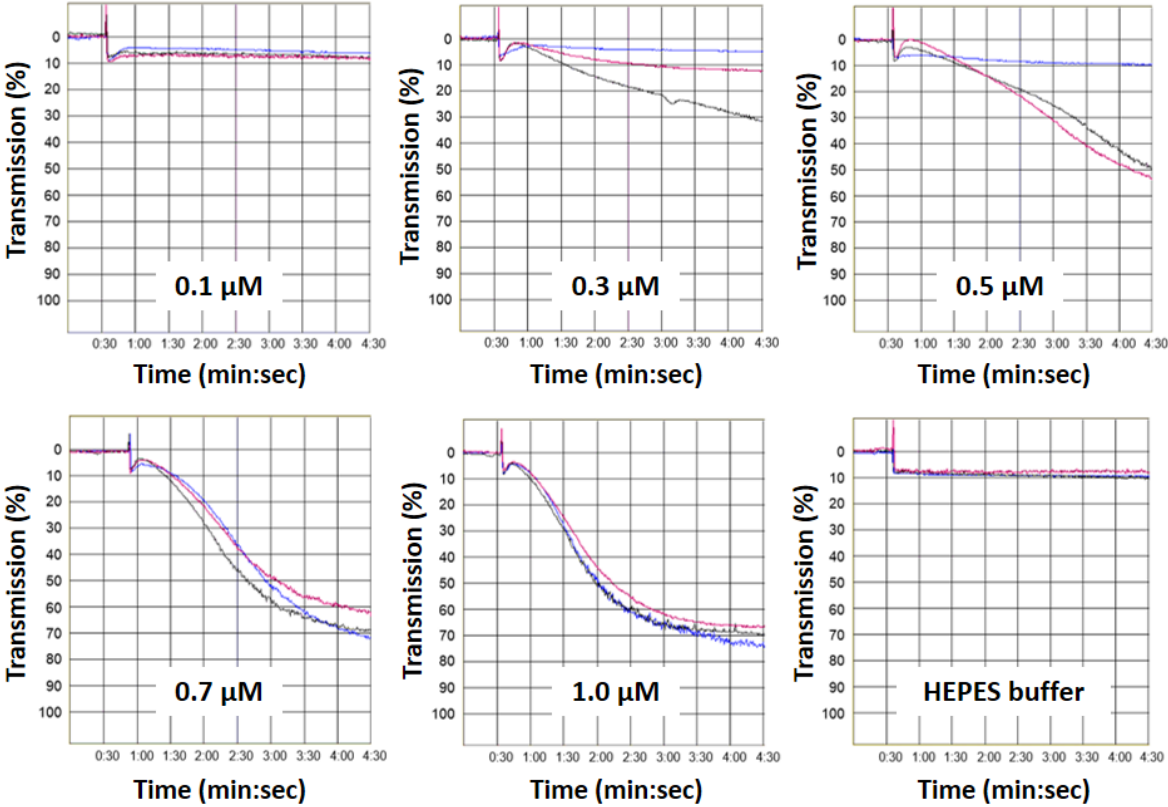

**Figure S1. Ca<sup>2+</sup>-ionophore (calcimycin) induced aggregation of gel-filtered platelets.** The aggregation curves shown in three different colors represent platelets obtained from different individuals. Calcimycin concentrations are shown in bold.

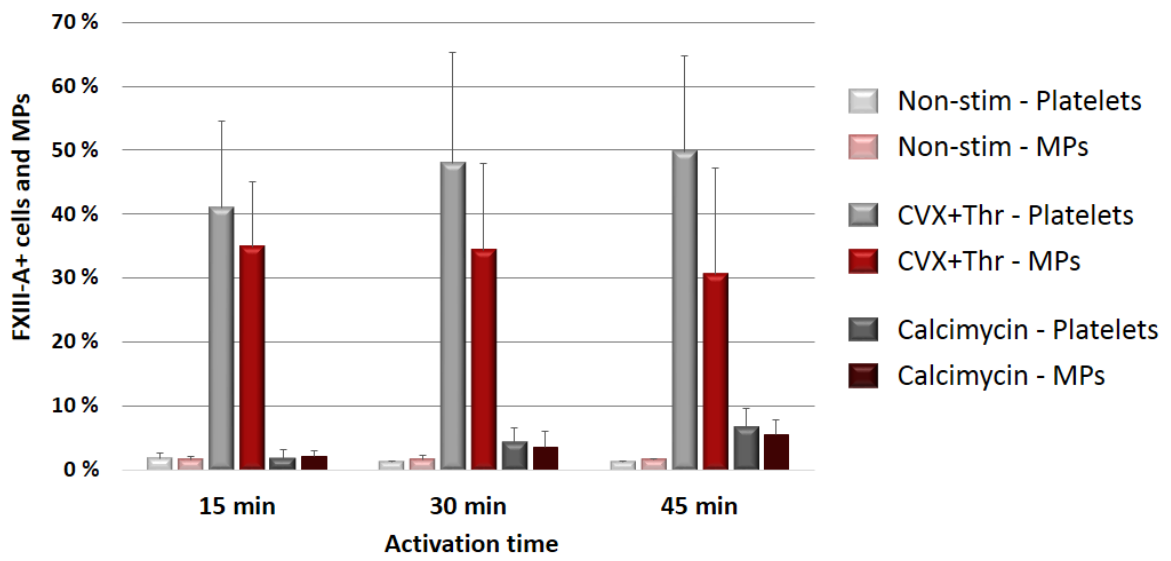

**Figure S2. cFXIII translocation in platelets activated by CVX+Thr or calcimycin for various time.** Non-stim: non-stimulated; MPs: microparticles; CVX: convulxin; Thr: thrombin

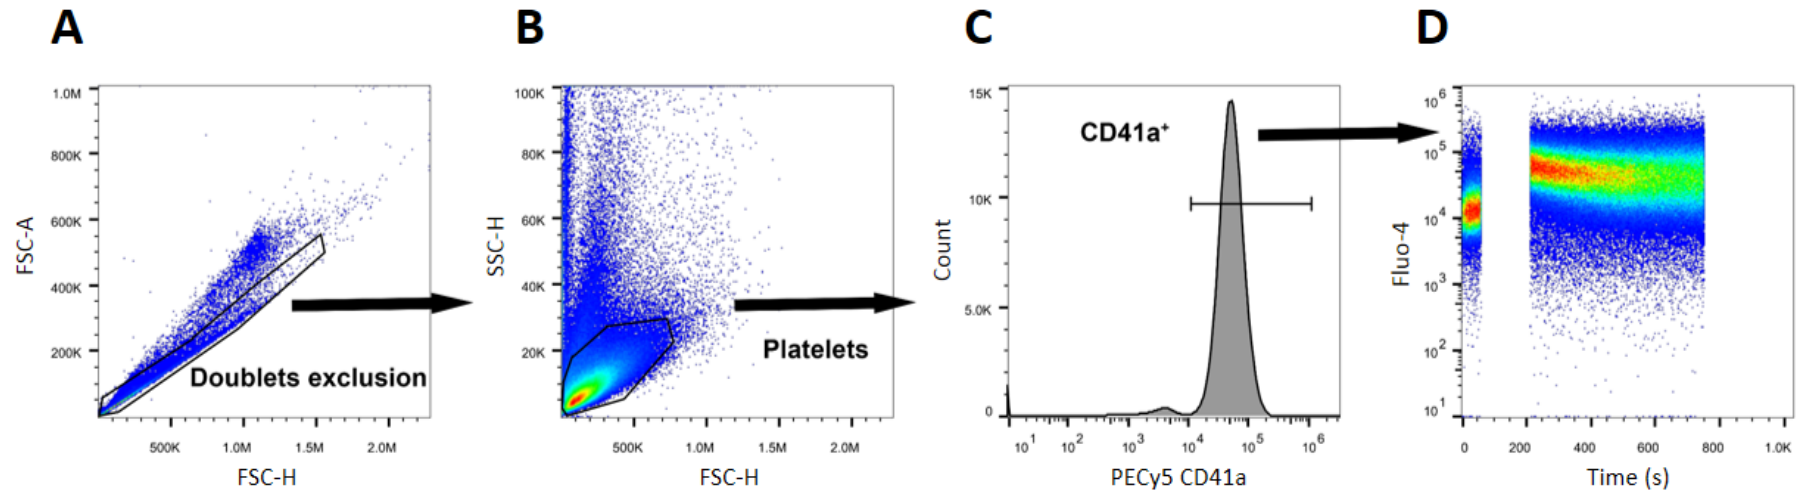

**Figure S3. Gating strategy for human platelets.** After doublets exclusion (FSC-H vs. FSC-A, panel A) and morphological gating (FSC-H vs. SSC-H, panel B), platelets were gated (panel C) and defined as CD41a+ cells. The CD41a+ gate was set based on the negative control (unstained cells, not shown). The Fluor-4 signal over time (D) is restricted to platelets gated in panel C.

| <b>% of platelets and microparticles with cFXIII exposed to the surface</b> |                          |                               |
|-----------------------------------------------------------------------------|--------------------------|-------------------------------|
| <b>T101 concentrations</b>                                                  | <b>Platelets Mean±SD</b> | <b>Microparticles Mean±SD</b> |
| 0 μM                                                                        | 49±18                    | 54±6                          |
| 10 μM                                                                       | 30±16                    | 33±14                         |
| 20 μM                                                                       | 25±13                    | 28±16                         |
| 50 μM                                                                       | 26±18                    | 26±16                         |
| 100 μM                                                                      | 17±15                    | 19±14                         |
| 200 μM                                                                      | 16±13                    | 20±15                         |

**Table S1. The effect of transglutaminase inhibitor, T101 on the translocation of cFXIII to the outer membrane layer in platelets activated by CVX+Thr.**
